# Supplementary material for: Dry Tablet Formulation of PLGA Nanoparticles with a Preocular Applicator for Topical Drug Delivery to the Eye
Source: PubMed Central journal article supplement (PMC6955998; doi:10.3390/pharmaceutics11120651), 2019-12-04
Supplement: pharmaceutics-11-00651-s001.pdf [file pharmaceutics-11-00651-s001.pdf]

# Supplementary Materials: Dry Tablet Formulation of PLGA Nanoparticles with a Preocular Applicator for Topical Drug Delivery to the Eye

Woo Mi Ryu, Se-Na Kim, Chang Hee Min, and Young Bin Choy

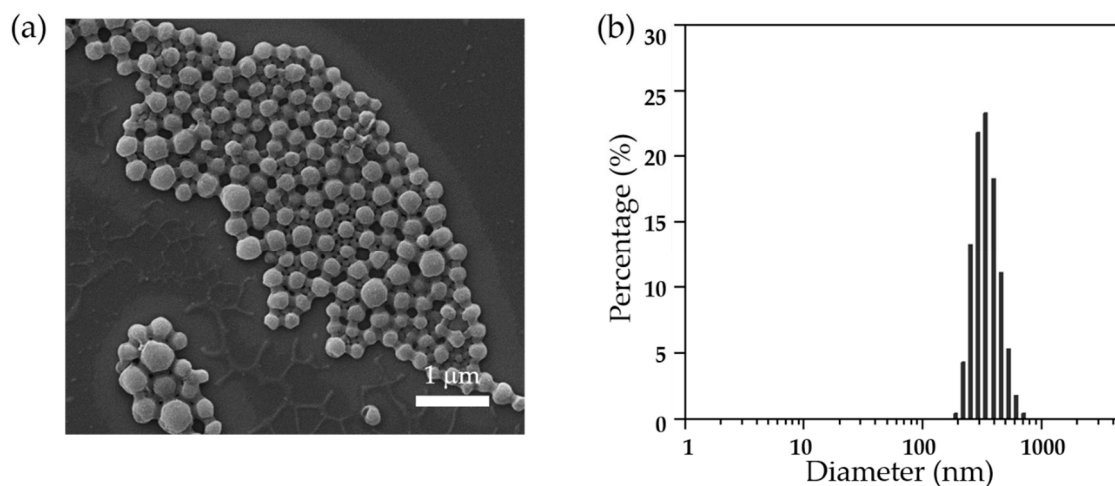

**Figure S1.** Characterization of NR/NP. (a) Representative scanning electron micrographs. (b) Dynamic light scattering result for size distribution. Polydispersity index = 0.158. The sizes of the NR/NP were similar to those of DX/NP.

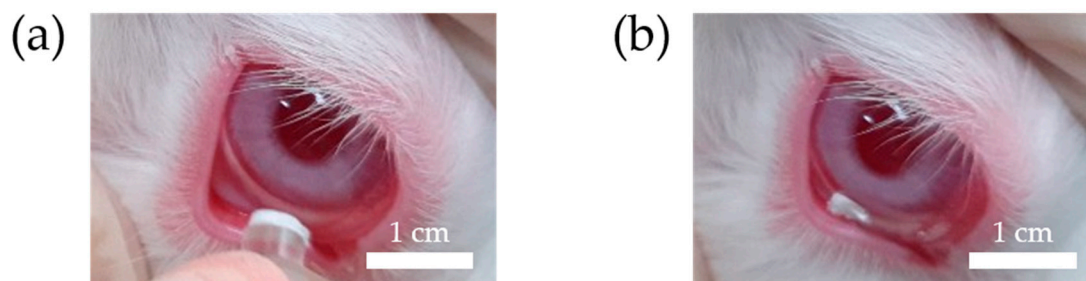

**Figure S2.** Images of rabbit eyes (a) before and (b) right after topical administration of the dry tablet using the applicator herein.
